# Supplementary material for: Loss of LIN-35, the Caenorhabditis elegans ortholog of the tumor suppressor p105Rb, results in enhanced RNA interference
Source: PubMed Central journal article supplement (PMC1431716; doi:10.1186/gb-2006-7-1-r4), 2006-01-20

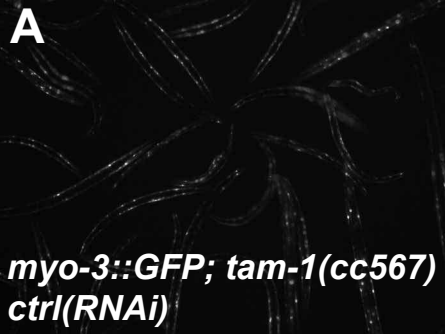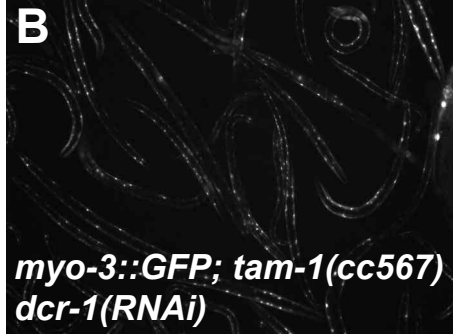

Supplement: gb-2006-7-1-r4-s6.pdf [file gb-2006-7-1-r4-s6.pdf]
